# Supplementary material for: Association of Ischemic Core Imaging Biomarkers With Post-Thrombectomy Clinical Outcomes in the MR CLEAN Registry
Source: PubMed Central journal article supplement (PMC8784730; doi:10.3389/fneur.2021.771367), 2022-01-10
Supplement: Data_Sheet_1.pdf [file Data_Sheet_1.pdf]

## SUPPLEMENTAL MATERIAL

### Appendix A

**Supplemental Figure I.** Distribution of CTP ischemic core volume (CBV <1.2 mL/100mL) for each Alberta Stroke Program Early CT Score (ASPECTS) category. The estimated core volume on perfusion imaging varied within the same ASPECTS.

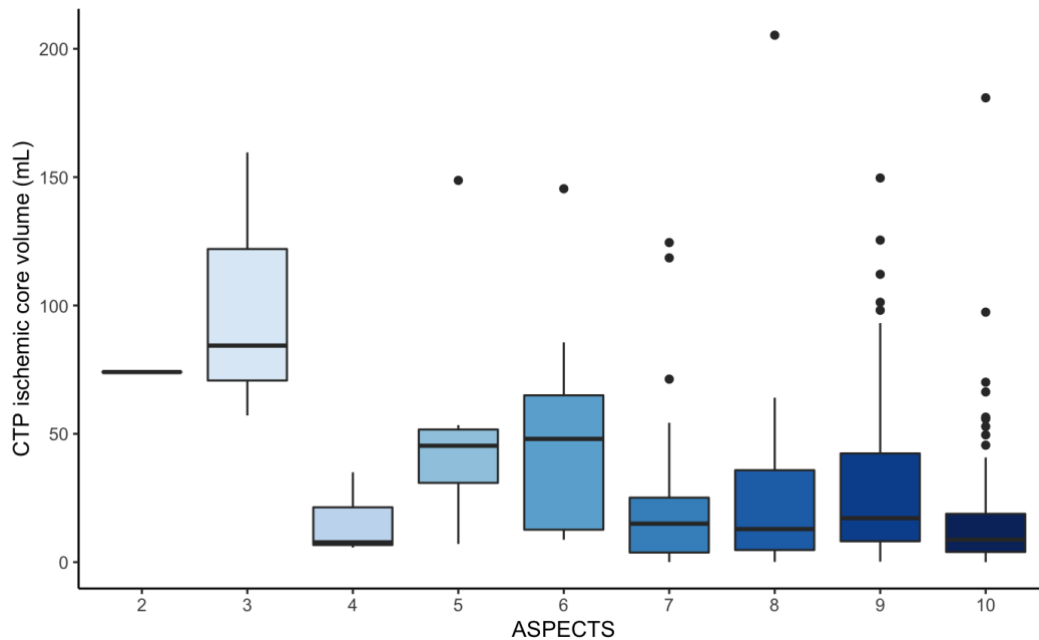

**Supplemental Figure II.** Distribution of CTP ischemic core volume (CBV <1.2 mL/100mL) for each CTA collateral score (CTA-CS) category. CTP ischemic core volumes were larger in patients with lower collateral scores. A higher degree of discordance was observed for lower CTA-CS with larger CTP ischemic core volumes.

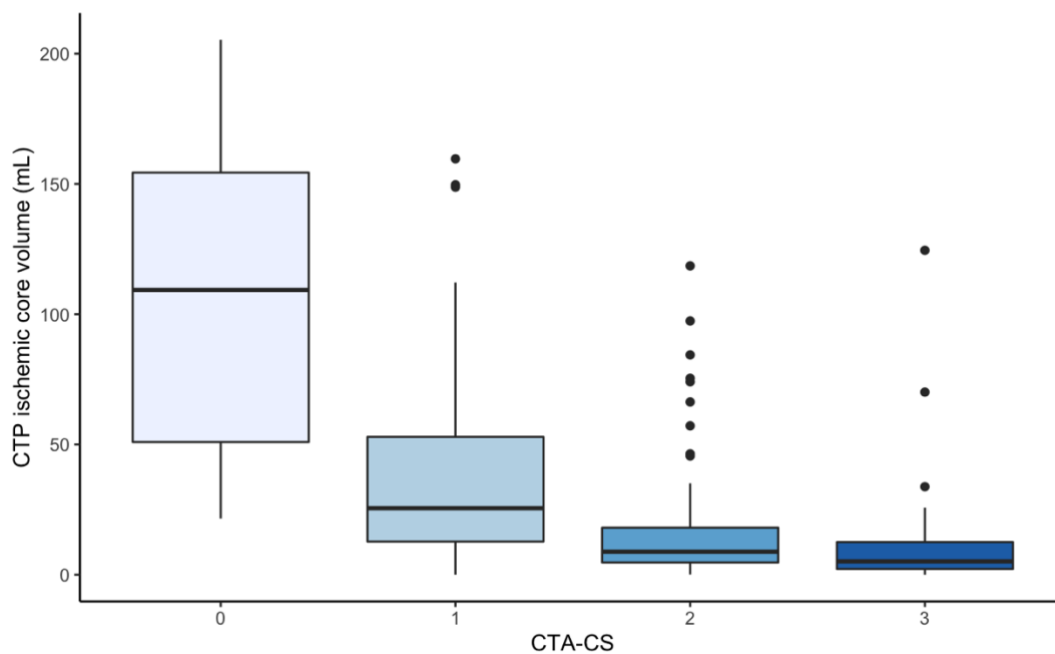

**Supplemental Table I. Univariable analysis of poor functional outcome (mRS 5-6).** ASPECTS, Alberta Stroke Program Early CT Score; CTA-CS; Computed Tomography Angiography Collateral Score; IVT, intravenous alteplase; mRS, modified Rankin Scale; NIHSS, National Institutes of Health Stroke Scale; OR, Odds Ratio.

| <b>Variables</b>                            | <b>OR (95% CI)</b>      | <b>P value</b>  |
|---------------------------------------------|-------------------------|-----------------|
| <b>CTP ischemic core volume (per 10 mL)</b> | <b>1.03 (1.02-1.05)</b> | <b>&lt;0.01</b> |
| <b>CTA-CS</b>                               | <b>0.93 (0.85-1.00)</b> | <b>0.07</b>     |
| <b>ASPECTS</b>                              | <b>0.98 (0.95-1.02)</b> | <b>0.43</b>     |
| Age (per year)                              | 0.93 (0.85-1.00)        | 0.07            |
| NIHSS (per point)                           | 0.98 (0.95-1.02)        | 0.43            |
| Male sex (vs. female)                       | 0.88 (0.78-1.00)        | 0.04            |
| IVT                                         | 0.98 (0.85-1.12)        | 0.70            |
| Onset-to-groin time (per 10 min)            | 1.01 (1.00- 1.01)       | 0.06            |
| Pre-mRS                                     | 1.16 (1.10-1.21)        | <0.01           |
| Occlusion location                          | 0.94 (0.86-1.02)        | 0.15            |

**Supplemental Table II. Multivariable analysis of poor functional outcome (mRS 5-6).**

ASPECTS, Alberta Stroke Program Early CT Score; CTA-CS; Computed Tomography Angiography Collateral Score; IVT, intravenous alteplase; mRS, modified Rankin Scale; NIHSS, National Institutes of Health Stroke Scale; aOR, adjusted Odds Ratio.

| <b>Variables</b>                            | <b>aOR (95% CI)</b>     | <b>P value</b>  |
|---------------------------------------------|-------------------------|-----------------|
| <b>CTP ischemic core volume (per 10 mL)</b> | <b>1.03(1.02-1.05)</b>  | <b>&lt;0.01</b> |
| NIHSS (per point)                           | 1.00 (0.99-1.01)        | 0.93            |
| Pre-mRS                                     | 1.11 (1.05-1.16)        | < 0.01          |
| Male sex (vs. female)                       | 0.90 (0.81-1.00)        | 0.09            |
| Age (per year)                              | 1.01 (1.01-1.01)        | <0.01           |
| IVT                                         | 1.07 (0.94-1.20)        | 0.23            |
| Onset-to-groin time (per 10 min)            | 1.00 (0.99-1.01)        | 0.08            |
| Occlusion location                          | 0.96 (0.88-1.02)        | 0.34            |
| <b>CTA-CS</b>                               | <b>0.96 (0.90-1.04)</b> | <b>0.29</b>     |
| NIHSS (per point)                           | 1.00 (0.99-1.01)        | 0.56            |
| Pre-mRS                                     | 1.12 (1.06-1.17)        | <0.01           |
| Male sex (vs. female)                       | 0.93 (0.83-1.03)        | 0.20            |
| Age (per year)                              | 1.01 (1.01-1.01)        | <0.01           |
| IVT                                         | 1.08 (0.95-1.21)        | 0.22            |
| Onset-to-groin time (per 10 min)            | 1.00 (1.00-1.01)        | 0.10            |
| Occlusion location                          | 0.95 (0.87-1.01)        | 0.19            |
| <b>ASPECTS</b>                              | <b>0.98 (0.96-1.02)</b> | <b>0.34</b>     |
| NIHSS (per point)                           | 1.00 (0.99-1.01)        | 0.40            |
| Pre-mRS                                     | 1.11 (1.06-1.16)        | <0.01           |
| Male sex (vs. female)                       | 0.93 (0.83-1.03)        | 0.17            |
| Age (per year)                              | 1.01 (1.01-1.01)        | <0.01           |
| IVT                                         | 1.09 (0.96-1.22)        | 0.16            |
| Onset-to-groin time (per 10 min)            | 1.00 (1.00-1.01)        | 0.16            |
| Occlusion location                          | 0.95 (0.87-1.01)        | 0.21            |

**Supplemental Figure III.** Distribution of the modified Rankin Scale (mRS) scores at 90 days for patients with CTP ischemic core volumes  $\geq 70$  mL versus  $<70$  mL.

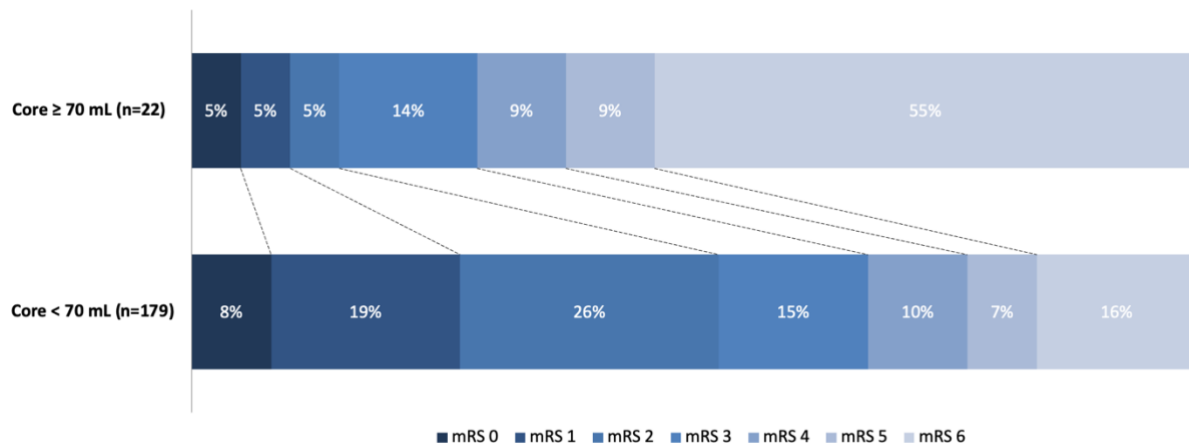

**Supplemental Figure IV.** Distribution of the modified Rankin Scale (mRS) scores at 90 days for patients with CTP ischemic core volumes  $\geq 50$  mL versus  $<50$  mL.

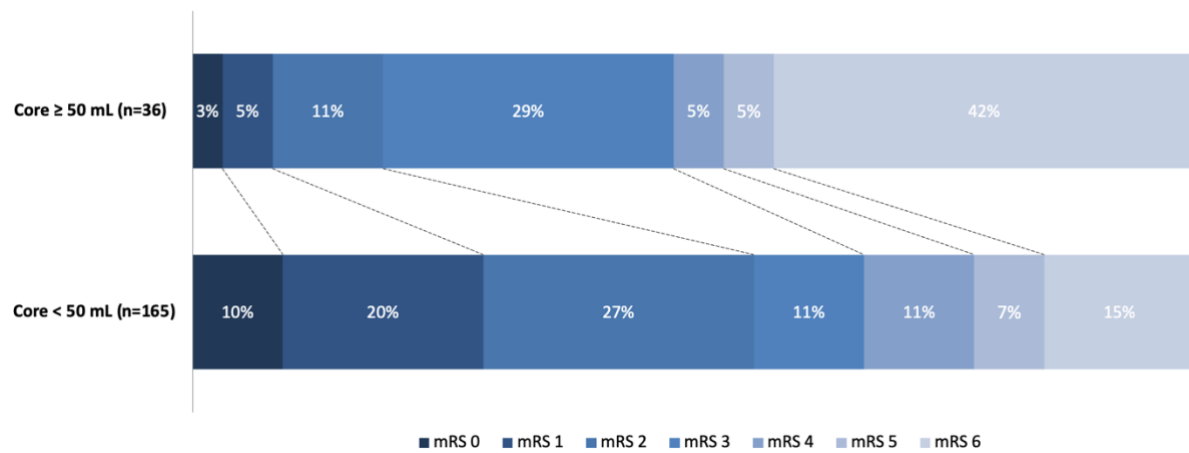

**Supplemental Table III.** Functional outcome (mRS) at 90 days stratified by ischemic core volume ( $\geq 50$  mL versus  $<50$  mL). mRS, modified Rankin Scale

|                                          | $\geq 50$ mL | $<50$ mL | <i>P</i> value  |
|------------------------------------------|--------------|----------|-----------------|
| Poor outcome (mRS 5-6) – n(%)            | 17(50)       | 34(22)   | <b>&lt;0.01</b> |
| Functional independence (mRS 0-2) – n(%) | 4(12)        | 86(56)   | <b>&lt;0.01</b> |
| Mortality– n(%)                          | 15(44)       | 23(15)   | <b>&lt;0.01</b> |
| sICH– n(%)                               | 4(11)        | 4(2)     | 0.02            |

**Supplemental Table IV. Association of imaging biomarkers with mortality and sICH.**  
 ASPECTS, Alberta Stroke Program Early CT Score; mRS, modified Rankin Scale;  
 aOR, adjusted Odds Ratio.

|                                      | <b>Mortality</b> |                 | <b>sICH</b>     |                 |
|--------------------------------------|------------------|-----------------|-----------------|-----------------|
|                                      | aOR(95%CI)       | <i>P</i> value  | aOR(95%CI)      | <i>P</i> value  |
| CTP ischemic core volume (per 10 mL) | 1.03(1.01-1.04)  | <b>&lt;0.01</b> | 1.01(1.01-1.02) | <b>&lt;0.01</b> |
| CTA-CS                               | 0.95(0.88-1.02)  | 0.14            | 0.96(0.92-0.99) | <b>0.02</b>     |
| ASPECTS                              | 0.98(0.95-1.01)  | 0.22            | 0.99(0.97-1.01) | 0.15            |

## Appendix B

### MR CLEAN Registry Investigators – group authors

#### Executive committee

Diederik W.J. Dippel<sup>1</sup>; Aad van der Lugt<sup>2</sup>; Charles B.L.M. Majoie<sup>3</sup>; Yvo B.W.E.M. Roos<sup>4</sup>; Robert J. van Oostenbrugge<sup>5</sup>; Wim H. van Zwam<sup>6</sup>; Jelis Boiten<sup>14</sup>; Jan Albert Vos<sup>8</sup>

#### Study coordinators

Ivo G.H. Jansen<sup>3</sup>; Maxim J.H.L. Mulder<sup>1,2</sup>; Robert- Jan B. Goldhoorn<sup>5,6</sup>; Kars C.J. Compagne<sup>2</sup>; Manon Kappelhof<sup>3</sup>; Josje Brouwer<sup>4</sup>; Sanne J. den Hartog<sup>1,2,40</sup>; Wouter H. Hinsenveld<sup>5,6</sup>;

#### Local principal investigators

Diederik W.J. Dippel<sup>1</sup>; Bob Roozenbeek<sup>1</sup>; Aad van der Lugt<sup>2</sup>; Adriaan C.G.M. van Es<sup>2</sup>; Charles B.L.M. Majoie<sup>3</sup>; Yvo B.W.E.M. Roos<sup>4</sup>; Bart J. Emmer<sup>3</sup>; Jonathan M. Coutinho<sup>4</sup>; Wouter J. Schonewille<sup>7</sup>; Jan Albert Vos<sup>8</sup>; Marieke J.H. Wermer<sup>9</sup>; Marianne A.A. van Walderveen<sup>10</sup>; Julie Staals<sup>5</sup>; Robert J. van Oostenbrugge<sup>5</sup>; Wim H. van Zwam<sup>6</sup>; Jeannette Hofmeijer<sup>11</sup>; Jasper M. Martens<sup>12</sup>; Geert J. Lycklama à Nijeholt<sup>13</sup>; Jelis Boiten<sup>14</sup>; Sebastiaan F. de Bruijn<sup>15</sup>; Lukas C. van Dijk<sup>16</sup>; H. Bart van der Worp<sup>17</sup>; Rob H. Lo<sup>18</sup>; Ewoud J. van Dijk<sup>19</sup>; Hieronymus D. Boogaarts<sup>20</sup>; J. de Vries<sup>22</sup>; Paul L.M. de Kort<sup>21</sup>; Julia van Tuijl<sup>21</sup>; Jo P. Peluso<sup>26</sup>; Puck Fransen<sup>22</sup>; Jan S.P. van den Berg<sup>22</sup>; Boudewijn A.A.M. van Hasselt<sup>23</sup>; Leo A.M. Aerden<sup>24</sup>; René J. Dallinga<sup>25</sup>; Maarten Uyttenboogaart<sup>28</sup>; Omid Eschgi<sup>29</sup>; Reinoud P.H. Bokkers<sup>29</sup>; Tobien H.C.M.L. Schreuder<sup>30</sup>; Roel J.J. Heijboer<sup>31</sup>; Koos Keizer<sup>32</sup>; Lonke S.F. Yo<sup>33</sup>; Heleen M. den Hertog<sup>22</sup>; Tomas Bulut<sup>35</sup>; Paul J.A.M. Brouwers<sup>34</sup>

#### Imaging assessment committee

Charles B.L.M. Majoie<sup>3</sup>(chair); Wim H. van Zwam<sup>6</sup>; Aad van der Lugt<sup>2</sup>; Geert J. Lycklama à Nijeholt<sup>13</sup>; Marianne A.A. van Walderveen<sup>10</sup>; Marieke E.S. Sprengers<sup>3</sup>; Sjoerd F.M. Jenniskens<sup>27</sup>; René van den Berg<sup>3</sup>; Albert J. Yoo<sup>38</sup>; Ludo F.M. Beenen<sup>3</sup>; Alida A. Postma<sup>6</sup>; Stefan D. Roosendaal<sup>3</sup>; Bas F.W. van der Kallen<sup>13</sup>; Ido R. van den Wijngaard<sup>13</sup>; Adriaan C.G.M. van Es<sup>2</sup>; Bart J. Emmer<sup>3</sup>; Jasper M. Martens<sup>12</sup>; Lonke S.F. Yo<sup>33</sup>; Jan Albert Vos<sup>8</sup>; Joost Bot<sup>36</sup>; Pieter-Jan van Doormaal<sup>2</sup>; Anton Meijer<sup>27</sup>; Elyas Ghariq<sup>13</sup>; Reinoud P.H. Bokkers<sup>29</sup>; Marc P. van Proosdij<sup>37</sup>; G. Menno Krietemeijer<sup>33</sup>; Jo P. Peluso<sup>26</sup>; Hieronymus D. Boogaarts<sup>20</sup>; Rob Lo<sup>18</sup>; Dick Gerrits<sup>35</sup>; Wouter Dinkelaar<sup>2</sup>; Auke P.A. Appelman<sup>29</sup>; Bas Hammer<sup>16</sup>; Sjoert Pegge<sup>27</sup>; Anouk van der Hoorn<sup>29</sup>; Saman Vinke<sup>20</sup>.

#### Writing committee

Diederik W.J. Dippel<sup>1</sup>(chair); Aad van der Lugt<sup>2</sup>; Charles B.L.M. Majoie<sup>3</sup>; Yvo B.W.E.M. Roos<sup>4</sup>; Robert J. van Oostenbrugge<sup>5</sup>; Wim H. van Zwam<sup>6</sup>; Geert J. Lycklama à Nijeholt<sup>13</sup>; Jelis Boiten<sup>14</sup>; Jan Albert Vos<sup>8</sup>; Wouter J. Schonewille<sup>7</sup>; Jeannette Hofmeijer<sup>11</sup>; Jasper M. Martens<sup>12</sup>; H. Bart van der Worp<sup>17</sup>; Rob H. Lo<sup>18</sup>

#### Adverse event committee

Robert J. van Oostenbrugge<sup>5</sup>(chair); Jeannette Hofmeijer<sup>11</sup>; H. Zwenneke Flach<sup>23</sup>

#### Trial methodologist

Hester F. Lingsma<sup>40</sup>

### Research nurses / local trial coordinators

Naziha el Ghannouti<sup>1</sup>; Martin Sterrenberg<sup>1</sup>; Wilma Pellikaan<sup>7</sup>; Rita Sprengers<sup>4</sup>; Marjan Elfrink<sup>11</sup>; Michelle Simons<sup>11</sup>; Marjolein Vossers<sup>12</sup>; Joke de Meris<sup>14</sup>; Tamara Vermeulen<sup>14</sup>; Annet Geerlings<sup>19</sup>; Gina van Vemde<sup>22</sup>; Tiny Simons<sup>30</sup>; Gert Messchendorp<sup>28</sup>; Nynke Nicolaij<sup>28</sup>; Hester Bongenaar<sup>32</sup>; Karin Bodde<sup>24</sup>; Sandra Kleijn<sup>34</sup>; Jasmijn Lodico<sup>34</sup>; Hanneke Droste<sup>34</sup>; Maureen Wollaert<sup>5</sup>; Sabrina Verheesen<sup>5</sup>; D. Jeurrissen<sup>5</sup>; Erna Bos<sup>9</sup>; Yvonne Drabbe<sup>15</sup>; Michelle Sandiman<sup>15</sup>; Nicoline Aldering<sup>11</sup>; Berber Zweedijk<sup>17</sup>; Jocova Vervoort<sup>21</sup>; Eva Ponjee<sup>22</sup>; Sharon Romviel<sup>19</sup>; Karin Kanselaar<sup>19</sup>; Denn Barning<sup>10</sup>.

### PhD / Medical students:

Esmee Venema<sup>40</sup>; Vicky Chalos<sup>1,40</sup>; Ralph R. Geuskens<sup>3</sup>; Tim van Straaten<sup>19</sup>; Saliha Ergezen<sup>1</sup>; Roger R.M. Harmsma<sup>1</sup>; Daan Muijres<sup>1</sup>; Anouk de Jong<sup>1</sup>; Olvert A. Berkhemer<sup>1,3,6</sup>; Anna M.M. Boers<sup>3,39</sup>; J. Huguet<sup>3</sup>; P.F.C. Groot<sup>3</sup>; Marieke A. Mens<sup>3</sup>; Katinka R. van Kranendonk<sup>3</sup>; Kilian M. Treurniet<sup>3</sup>; Manon L. Tolhuisen<sup>3,39</sup>; Heitor Alves<sup>3</sup>; Annick J. Weterings<sup>3</sup>; Eleonora L.F. Kirkels<sup>3</sup>; Eva J.H.F. Voogd<sup>11</sup>; Lieve M. Schupp<sup>3</sup>; Sabine L. Collette<sup>28,29</sup>; Adrien E.D. Groot<sup>4</sup>; Natalie E. LeCouffe<sup>4</sup>; Praneeta R. Konduri<sup>39</sup>; Haryadi Prasetya<sup>39</sup>; Nerea Arrarte-Terreros<sup>39</sup>; Lucas A. Ramos<sup>39</sup>.

### List of affiliations

Department of Neurology<sup>1</sup>, Radiology<sup>2</sup>, Public Health<sup>40</sup>, Erasmus MC University Medical Center;

Department of Radiology and Nuclear Medicine<sup>3</sup>, Neurology<sup>4</sup>, Biomedical Engineering & Physics<sup>39</sup>, Amsterdam UMC, University of Amsterdam, Amsterdam;

Department of Neurology<sup>5</sup>, Radiology<sup>6</sup>, Maastricht University Medical Center and Cardiovascular Research Institute Maastricht (CARIM);

Department of Neurology<sup>7</sup>, Radiology<sup>8</sup>, Sint Antonius Hospital, Nieuwegein;

Department of Neurology<sup>9</sup>, Radiology<sup>10</sup>, Leiden University Medical Center;

Department of Neurology<sup>11</sup>, Radiology<sup>12</sup>, Rijnstate Hospital, Arnhem;

Department of Radiology<sup>13</sup>, Neurology<sup>14</sup>, Haaglanden MC, the Hague;

Department of Neurology<sup>15</sup>, Radiology<sup>16</sup>, HAGA Hospital, the Hague;

Department of Neurology<sup>17</sup>, Radiology<sup>18</sup>, University Medical Center Utrecht;

Department of Neurology<sup>19</sup>, Neurosurgery<sup>20</sup>, Radiology<sup>27</sup>, Radboud University Medical Center, Nijmegen;

Department of Neurology<sup>21</sup>, Radiology<sup>26</sup>, Elisabeth-TweeSteden ziekenhuis, Tilburg;

Department of Neurology<sup>22</sup>, Radiology<sup>23</sup>, Isala Klinieken, Zwolle;

Department of Neurology<sup>24</sup>, Radiology<sup>25</sup>, Reinier de Graaf Gasthuis, Delft;

Department of Neurology<sup>28</sup>, Radiology<sup>29</sup>, University Medical Center Groningen;

Department of Neurology<sup>30</sup>, Radiology<sup>31</sup>, Atrium Medical Center, Heerlen;

Department of Neurology<sup>32</sup>, Radiology<sup>33</sup>, Catharina Hospital, Eindhoven;

Department of Neurology<sup>34</sup>, Radiology<sup>35</sup>, Medisch Spectrum Twente, Enschede;

Department of Radiology<sup>36</sup>, Amsterdam UMC, Vrije Universiteit van Amsterdam, Amsterdam;

Department of Radiology<sup>37</sup>, Noordwest Ziekenhuisgroep, Alkmaar;

Department of Radiology<sup>38</sup>, Texas Stroke Institute, Texas, United States of America.
